# Supplementary material
Source: PubMed Central journal article supplement (PMC6682028)
Supplement: ao9b00883_si_001.pdf [file ao9b00883_si_001.pdf]

# Supplementary Information

## Engineering of Gadolinium Decorated Graphene Oxide Nanosheets for Multimodal Bioimaging and Drug Delivery

Nitya Chawda<sup>1</sup>, Mainak Basu<sup>2,4</sup>, Dipanwita Majumdar<sup>3</sup>, Raju Poddar<sup>4</sup>, Santosh Kumar Mahapatra<sup>5</sup>, and Indrani Banerjee<sup>1,\*</sup>

<sup>1</sup>School of Nano Sciences, Central University of Gujarat, Gandhinagar, India

<sup>2</sup>School of Basic and Applied Sciences, GD Goenka University, Gurgaon, Haryana, India

<sup>3</sup>Department of Chemistry, Chandernagore College, Chandannagar, Hooghly, WB-712136, India

<sup>4</sup>Department of Biotechnology, Birla Institute of Technology, Mesra, Ranchi, India

<sup>5</sup>School of Physical Sciences, Central University of Punjab, Bhatinda, India

\*Corresponding Author: Tel: +91 9470564719

### 1. UV-Visible analysis

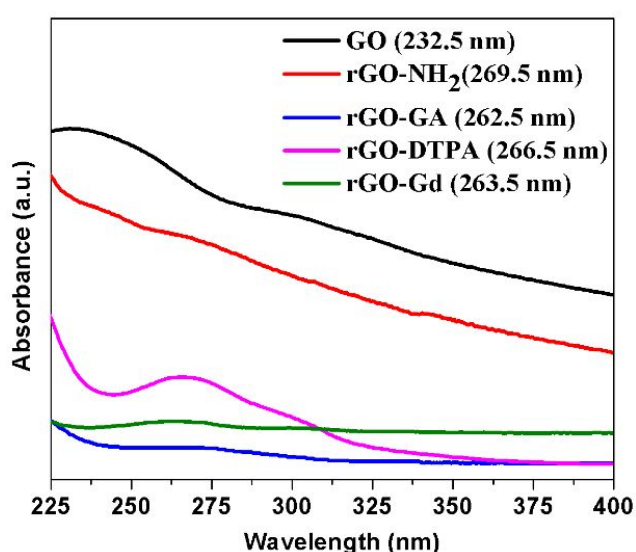

**Figure S1:** Absorption spectra of synthesis steps of graphene oxide to Gd-rGONSs, graphene oxide (GO), reduced graphene oxide-NH<sub>2</sub> (rGO-NH<sub>2</sub>), reduced graphene oxide-gluconic acid (rGO-GA), reduced graphene oxide-diethylenetriaminepentaacetic acid (rGO-DTPA), reduced graphene oxide-gadolinium (rGO-Gd).

Fig. S1. Shows the absorption spectra of all the synthesis and functionalization steps involved from GO to Gd-GO. The absorbance maximum for GO was at ~232 nm whereas for rGO-NH<sub>2</sub>, rGO-GA, rGO-DTPA, rGO-Gd are ~ 269.5 nm, ~ 262.5 nm, ~ 266.5 nm, and ~ 263.5 nm respectively. The red shift of the absorbance peak could be considered due to functionalization which would have caused reduction of GO and restoring sp<sup>2</sup> hybridization type of conjugation<sup>1</sup>. The shift of the absorbance peak is due to conjugation of -NH<sub>2</sub> with a lone pair connected to a  $\pi$  bond. The reduction of GO and p- $\pi$  conjugated effect takes place increasing motion of electrons which cause absorption band to move along higher wavelength<sup>2</sup>.

## 2. FTIR analysis

The demonstrated FTIR spectra show difference in stretching frequency and their shift after each functionalization steps (Fig. S2). Stretching frequencies of GO to Gd-rGO at  $\sim 3117$ ,  $3118$ ,  $3151$ ,  $3081$  and  $3100$   $\text{cm}^{-1}$  is attributed to hydrogen-bonded-O-H stretching vibration.

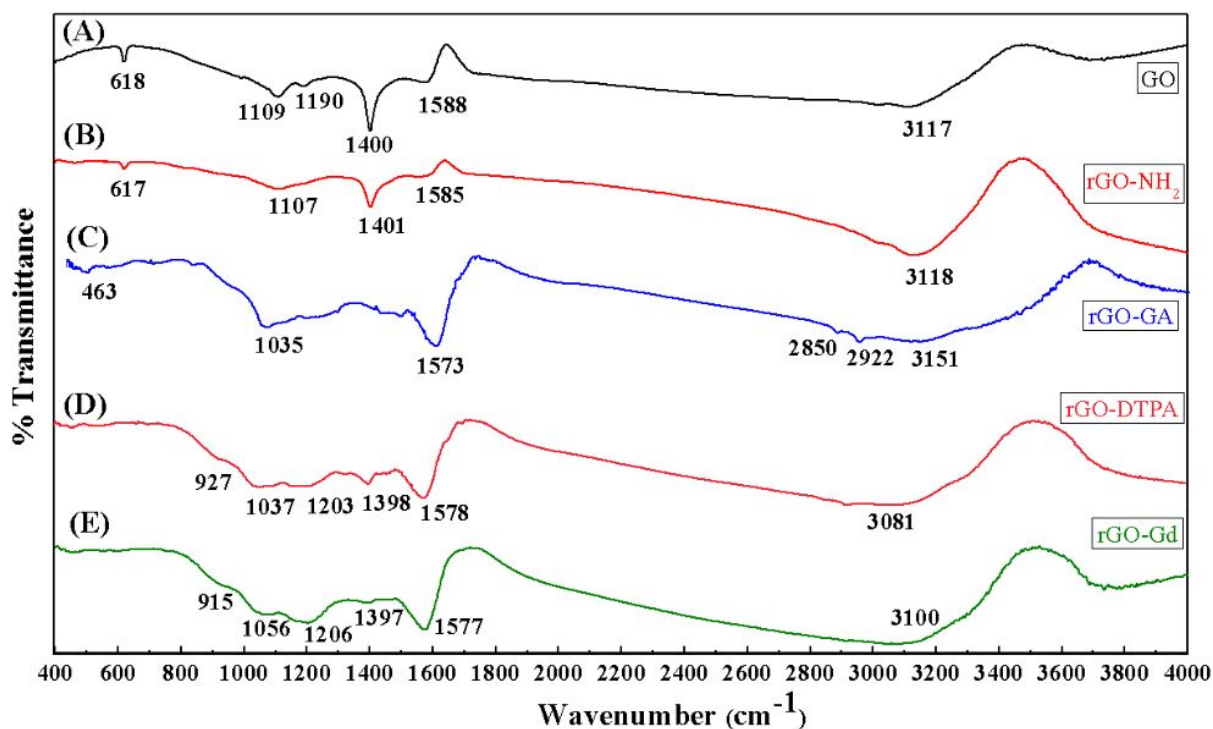

**Figure S2:** Comparative FTIR spectra of graphene oxide (GO-A), reduced graphene oxide-NH<sub>2</sub> (rGO-NH<sub>2</sub>-B), reduced graphene oxide-gluconic acid (rGO-GA-C), reduced graphene oxide-diethylenetriaminepentaacetic acid (rGO-DTPA-D), reduced graphene oxide-gadolinium (rGO-Gd-E).

The obtained spectra of GA-rGO revealed changes over rGO surface after functionalization by organic molecules. This could be observed by stretching frequency at  $\sim 2922$  and  $2850$   $\text{cm}^{-1}$  due to C-H sp<sup>3</sup> stretching. The GO exhibit two minor peaks at  $\sim 1588$  and  $1109$   $\text{cm}^{-1}$  for C=C and C-O-H stretching vibrations respectively. This stretching vibrations were shifted in case of rGO-NH<sub>2</sub> by 3 and 2  $\text{cm}^{-1}$  to  $\sim 1585$  and  $1107$   $\text{cm}^{-1}$  revealing reduction of GO to rGO<sup>3</sup>. Similar change was also observed for 1400 and 1401  $\text{cm}^{-1}$  for O-H bendings. After the functionalization of rGO-NH<sub>2</sub> sample, N-H bending was prominently observed for rGO-GA, DTPA and Gd at 1573, 1578 and 1577  $\text{cm}^{-1}$  respectively. The functionalization of rGO has not brought any deformities over rGO surface as could be evident by slight shift of C-O stretching frequency obtained at 1035, 1037 and 1056  $\text{cm}^{-1}$  for rGO-GA, DTPA and Gd respectively. The similar observation is demonstrated by further functionalization with bulkier molecule like DTPA as two new peak were observed for C=N or C-O deformation

vibration at  $1398\text{ cm}^{-1}$  while C-N or C-O epoxide at  $1203\text{ cm}^{-1}$  respectively for rGO-DTPA. There was slight shift of this stretching frequency to  $1397\text{ cm}^{-1}$  and  $1206\text{ cm}^{-1}$  after decoration with  $\text{Gd}^{3+}$  ions which were chelated by DTPA<sup>4</sup>. The FTIR signature of graphene basal plane is observed in range of  $\sim 600\text{-}900\text{ cm}^{-1}$  which is observed in all the FTIR spectra for samples<sup>5</sup>.

### 3. FESEM Imaging

Fig. S3, shows the FESEM images of GO to Gd-rGO, GO showed clear composed structure with only few defects and less wrinkles.

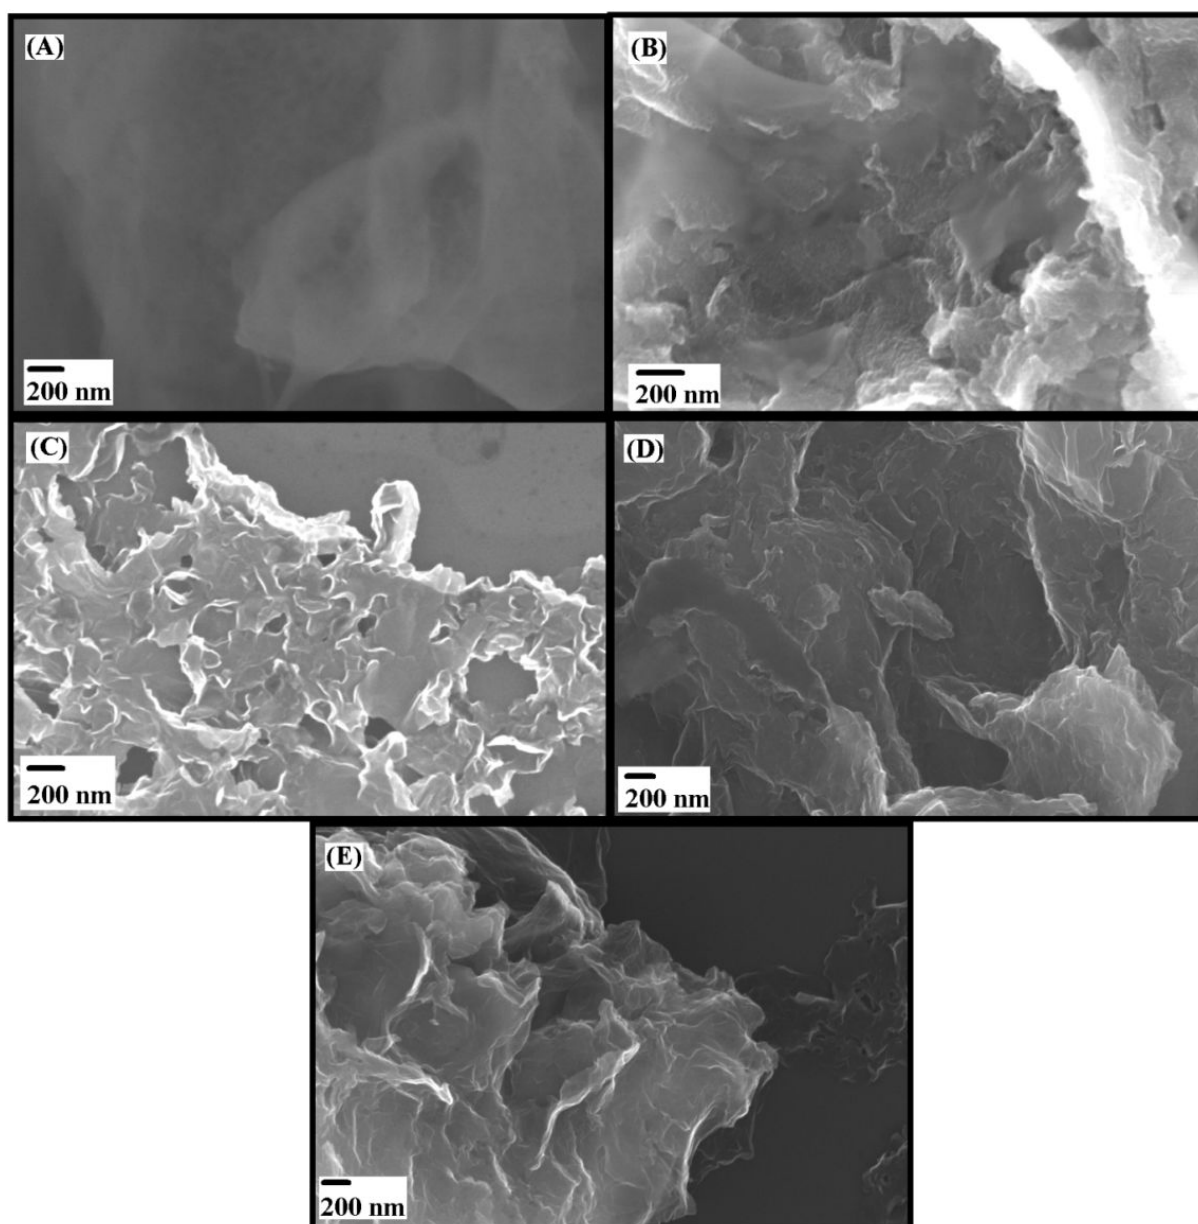

**Figure S3:** FESEM images of synthesis step of graphene oxide to Gd-rGONSs, graphene oxide (GO-A), reduced graphene oxide- $\text{NH}_2$  (rGO- $\text{NH}_2$ -B), reduced graphene oxide-gluconic acid (rGO-GA-C), reduced graphene oxide-diethylenetriaminepentaacetic acid (rGO-DTPA-D), reduced graphene oxide-gadolinium (rGO-Gd-E).

Fig. S2-B, showed different morphology of increased defects which can be found as rich in wrinkles and fluctuation resulted by reduction of the GO surface while changing to rGO-NH<sub>2</sub>. The further functionalization with D-gluconic acid (GA) resulted in fluffy and more transparent morphology. The wrinkles were also reduced which enhanced water dispersity of the rGO-GA sample. Next step of functionalization with DTPA changed morphology by inducing aggregation of the rGO surface and increasing active surface sites (Fig. S3-D). The activated surface was later used for decorating Gd<sup>3+</sup> ions to increase effective surface area and composing surface towards continuous and uniform sheets by reducing fluctuations which is evident from Fig. S3-E.

#### 4. UV-vis spectral of leached Gd<sup>3+</sup> ions in presence of xylenol orange

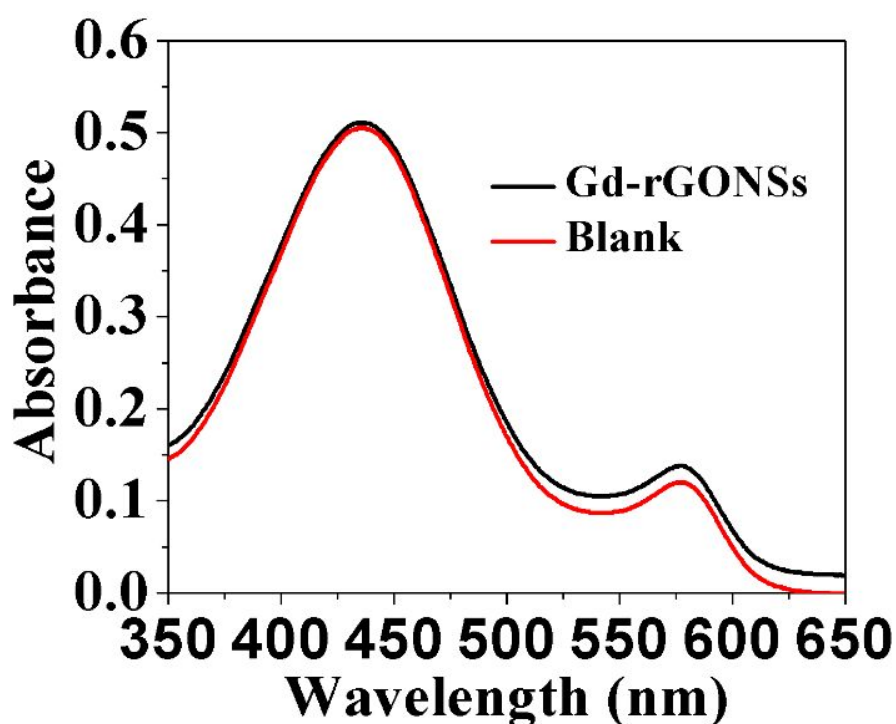

**Figure S4.** UV-vis spectral of leached Gd<sup>3+</sup> ions in presence of xylenol orange in acetate buffer (pH 5.8) from Gd-rGONSs and compared with blank.

## 5. Cell viability of H1299 cells incubated with GO and Gd-rGONSs

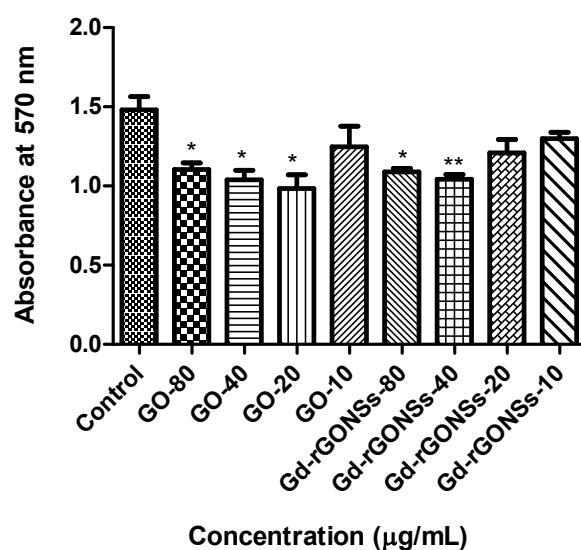

**Figure S5.** Cell viability of H1299 cells incubated with GO and Gd-rGONSs at various concentrations for 24 h. Bars represent means  $\pm$ SEM, n = 3. \* p < 0.05 - \*\*p < 0.01.

## 6. Comparative drug release studies

**Table S1. Comparative drug release studies of 5-FU and Graphene-based Nanocarrier**

| Graphene-based Nanocarrier                                                           | loading/release medium | loading/ release                           | Ref.      |
|--------------------------------------------------------------------------------------|------------------------|--------------------------------------------|-----------|
| Chitosan-functionalized GO                                                           | Water/PBS              | 0.053 mg·mg <sup>-1</sup> / 50%            | 6         |
| ALG functionalized GO                                                                | Water/PBS              | 24.40%/ >60% in the first 3 h              | 7         |
| Magnetic Fe <sub>3</sub> O <sub>4</sub> / GO nanocomposites                          | PBS/PBS                | 0.37 mg·mg <sup>-1</sup> /21% in 24 h      | 8         |
| Graphene nanosheet–CNT–iron oxide NPs hybrid                                         | Water/PBS              | 0.27 mg mg <sup>-1</sup> /15.7% in 8 h     | 9         |
| Fe <sub>3</sub> O <sub>4</sub> /SiO <sub>2</sub> /graphene–CdTeQDs/CS nanocomposites | pH = 5.5/PBS           | 70 wt%/~90 % in 168 h                      | 10        |
| rGO/AuNCs/SE hydrogel                                                                | Water/PBS              | N.A./~50% in 24 h                          | 11        |
| PVA-SPIONs-GO nanocomposite                                                          | N.A./PBS               | 35.91%/ 80.6%. in 100 h                    | 12        |
| Hollow core/shell Fe <sub>3</sub> O <sub>4</sub> @GO composites                      | PBS/PBS                | 0.41 mg mg <sup>-1</sup> / 11.46% in ~24 h | 13        |
| Gd-GONSs                                                                             | Water/PBS              | 0.26 mg·mg <sup>-1</sup> /~92 % in 72 h    | This work |
| GO                                                                                   | Water/PBS              | 0.19 mg·mg <sup>-1</sup> /~92 % in 72 h    | This work |

**Abbreviations:** GO, Graphene oxide; Gd-GONSs, Gadolinium-Graphene oxide nanosheets; ALG, Sodium alginate; CNT, Carbon nanotube; NPs, Nanoparticles; rGO, reduced graphene oxide; AuNCs, gold nanocages; SE, spinach extract; PVA, polyvinyl alcohol; CS, chitosan; SPIONs, superparamagnetic iron oxide nanoparticles; PBS, phosphate-buffered saline; QDs, Quantum dots; NA, Not Available.

## 7. Comparative $r_1$ relaxivity studies

**Table S2.** Comparative  $r_1$  relaxivity studies of Graphene-based MR contrast agent and Gd-rGONSs

| <b>Graphene-based MR contrast agent</b>                                                  | <b><math>r_1</math><br/>(<math>\text{mM}^{-1} \text{s}^{-1}</math>)</b> | <b>Tesla (T)</b> | <b>Ref.</b> |
|------------------------------------------------------------------------------------------|-------------------------------------------------------------------------|------------------|-------------|
| GO-DOTA-Gd complex                                                                       | 14.2                                                                    | 11.7 T           | 14          |
| Poly(amidoamine) dendrimer-grafted gadolinium-functionalized nanographene oxide (Gd-NGO) | 7.59                                                                    | 7 T              | 15          |
| Paramagnetic graphene quantum dots (GQDs)-folate-GdGQDs                                  | 11.49                                                                   | 7 T              | 16          |
| Gd-GONSs                                                                                 | 16.85                                                                   | 1.5 T            | This work   |

**Abbreviations:** GO, Graphene oxide; Gd-GONSs, Gadolinium-Graphene oxide nanosheets; DOTA, tetraacetate; NGO, nanographene oxide; GQDs, quantum dots.

## References

- (1) Dadosh, T.; Gordin, Y.; Krahn, R.; Khivrich, I.; Mahalu, D.; Frydman, V.; Sperling, J.; Yacoby, A.; Bar-Joseph, I. Measurement of the Conductance of Single Conjugated Molecules. *Nature* **2005**, *436* (7051), 677–680.
- (2) Peng, T.; Sun, H.; Peng, T.; Liu, B.; Zhao, X. Structural Regulation and Electroconductivity Change of Nitrogen-Doping Reduced Graphene Oxide Prepared Using p-Phenylene Diamine as Modifier. *Nanomaterials* **2017**, *7* (10), 292.
- (3) Jung, I.; Rhyee, J.-S.; Son, J. Y.; Ruoff, R. S.; Rhee, K.-Y. Colors of Graphene and Graphene-Oxide Multilayers on Various Substrates. *Nanotechnology* **2012**, *23* (2), 025708.
- (4) Lu, J.; Li, Y.; Li, S.; Jiang, S. P. Self-Assembled Platinum Nanoparticles on Sulfonic Acid-Grafted Graphene as Effective Electrocatalysts for Methanol Oxidation in Direct Methanol Fuel Cells. *Sci. Rep.* **2016**, *6* (1), 21530.
- (5) Verma, S.; Dutta, R. K. A Facile Method of Synthesizing Ammonia Modified Graphene Oxide for Efficient Removal of Uranyl Ions from Aqueous Medium. *RSC Adv.* **2015**, *5* (94), 77192–77203.
- (6) Rana, V. K.; Choi, M.; Kong, J.; Kim, G. Y.; Kim, M. J.; Kim, S.; Mishra, S.; Singh, R. P.; Ha, C. Synthesis and Drug-Delivery Behavior of Chitosan-Functionalized Graphene Oxide Hybrid Nanosheets. *Macromol. Mater. Eng.* **2011**, *296* (2), 131–140.
- (7) Zhang, B.; Yan, Y.; Shen, Q.; Ma, D.; Huang, L.; Cai, X.; Tan, S. A Colon Targeted Drug Delivery System Based on Alginate Modified Graphene Oxide for Colorectal Liver Metastasis. *Mater. Sci. Eng. C* **2017**, *79*, 185–190.
- (8) Wang, G.; Chen, G.; Wei, Z.; Dong, X.; Qi, M. Multifunctional Fe<sub>3</sub>O<sub>4</sub>/Graphene Oxide Nanocomposites for Magnetic Resonance Imaging and Drug Delivery. *Mater. Chem. Phys.* **2013**, *141* (2–3), 997–1004.
- (9) Fan, X.; Jiao, G.; Gao, L.; Jin, P.; Li, X. The Preparation and Drug Delivery of a Graphene–carbon Nanotube–Fe<sub>3</sub>O<sub>4</sub> Nanoparticle Hybrid. *J. Mater. Chem. B* **2013**, *1* (20), 2658.
- (10) Ou, J.; Wang, F.; Huang, Y.; Li, D.; Jiang, Y.; Qin, Q.; Stachurski, Z. H.; Tricoli, A.; Zhang, T. Fabrication and Cyto-Compatibility of Fe<sub>3</sub>O<sub>4</sub>/SiO<sub>2</sub>/Graphene–CdTe QDs/CS Nanocomposites for Drug Delivery. *Colloids Surfaces B Biointerfaces* **2014**, *117*, 466–472.
- (11) Chang, G.; Li, S.; Huang, F.; Zhang, X.; Shen, Y.; Xie, A. Multifunctional Reduced Graphene Oxide Hydrogel as Drug Carrier for Localized and Synergic Photothermal/Photodynamics/Chemo Therapy School of Chemistry and Chemical Engineering, Collaborative Innovation Center of Modern. *J. Mater. Sci. Technol.* **2016**.

- (12) Aliabadi, M.; Shagholani, H.; Yunessnia, A. International Journal of Biological Macromolecules Synthesis of a Novel Biocompatible Nanocomposite of Graphene Oxide and Magnetic Nanoparticles for Drug Delivery. *Int. J. Biol. Macromol.* **2017**, *98*, 287–291.
- (13) Wang, J.; Fang, J.; Fang, P.; Li, X.; Wu, S.; Zhang, W. Preparation of Hollow Core/Shell Fe<sub>3</sub>O<sub>4</sub>@Graphene Oxide Composites as Magnetic Targeting Drug Nanocarriers. *J. Biomater. Sci. Polym. Ed.* **2017**, *5063*, 0.
- (14) Zhang, M.; Liu, X.; Huang, J.; Wang, L.; Shen, H.; Luo, Y.; Li, Z.; Zhang, H.; Deng, Z.; Zhang, Z. Ultrasmall Graphene Oxide Based T<sub>1</sub> MRI Contrast Agent for in Vitro and in Vivo Labeling of Human Mesenchymal Stem Cells. *Nanomedicine Nanotechnology, Biol. Med.* **2017**, 1–9.
- (15) Yang, H.; Huang, C.-Y.; Lin, C.; Liu, H.; Huang, C.; Liao, S.; Chen, P.; Lu, Y.; Wei, K.; Ma, C. M. Gadolinium-Functionalized Nanographene Oxide for Combined Drug and MicroRNA Delivery and Magnetic Resonance Imaging. *Biomaterials* **2014**, *35* (24), 6534–6542.
- (16) Huang, C.-L.; Huang, C.; Mai, F.; Yen, C.; Tzing, S.; Hsieh, H.; Ling, Y.; Chang, J. Application of Paramagnetic Graphene Quantum Dots as a Platform for Simultaneous Dual-Modality Bioimaging and Tumor-Targeted Drug Delivery. *J. Mater. Chem. B* **2015**, *3* (4), 651–664.
